# 1 **On Modeling the Macroecology of Baleen Whale Migration**

2 James R. Watson<sup>1,2</sup>, Bruna Favetta<sup>2</sup>, Charles Stock<sup>3,\*</sup>

3 **1 Atmospheric and Oceanic Sciences Program, Princeton University, Princeton, NJ 08544,**  
4 **USA**

5 **2 Department of Ecology and Evolutionary Biology, Princeton University, Princeton, NJ**  
6 **08544, USA**

7 **3 The Geophysical Fluid Dynamics Laboratory, NOAA, Princeton, NJ 08540, USA**

8 **\* E-mail: Corresponding [jrwatson@princeton.edu](mailto:jrwatson@princeton.edu)**

## 9 **Abstract**

10 Long distance migrations are well known to occur in many baleen whale species. Yet, a global synthesis  
11 of this information is lacking. Here, we study baleen whales as a group and at a global scale, first  
12 analyzing the grey and peer-reviewed literature for information on the location of baleen whale calving  
13 and feeding grounds around the world. This information was then combined with modeled-data produced  
14 from an Earth System Model to estimate the global distribution of baleen whale calving and feeding  
15 habitats. A simple network theoretic heuristic was then used to identify the shortest over-water path  
16 connecting habitats. These shortest paths map well to known major migration routes for a number  
17 of species, suggesting that migration has evolved primarily to minimize travel distances. Identifying  
18 distance minimizing routes globally, that have demonstrable consistency to known migration routes for  
19 certain baleen whale species, offers a useful baseline perspective on large-scale migration patterns, from  
20 which many perturbations can be judged. As an example, we used our modeled migration routes to  
21 identify regions of the ocean that are likely hotspots of whale ship-strikes. Such information is useful for  
22 developing global conservation and management priorities for baleen whales.

## 23 Introduction

24 That baleen whales migrate is well known [1, 2]. One can observe them doing so from the numerous  
25 whale watching tours that are available around the world, and scientists have photographed and tagged  
26 individual whales, and tracked their travels [3–8]. From such data, and other sources of information, such  
27 as historical whaling charts [9], persistent long distance migration routes have been identified around the  
28 world, from the Gulf of California, the Hawaiian islands and the China Sea, to the Bering and Chuckchi  
29 Seas; from South Africa, Australia, New Zealand, Chile and Argentina, to the Southern Ocean and the  
30 Antarctic peninsula; from the Caribbean and the west coast of Africa, to the north Atlantic and Arctic.  
31 The list goes on. However, this information is rarely synthesized, with most studies focusing on migration  
32 patterns in specific regions and on specific species. Here, we make a global analysis of migration for baleen  
33 whales as a group, identifying the factors that likely determine migration patterns throughout the world’s  
34 oceans.

35 Annual migrations are commonly seen in baleen whales of different species, for example in hump-  
36 back [10] and gray whales [1], where individuals travel between warm low-latitude breeding grounds, and  
37 productive high-latitude feeding grounds [2]. Other baleen species are known to have more diffuse migra-  
38 tion patterns, such as blue [5], sei [11] and fin [2] whales, but of those that make latitudinal migrations,  
39 they are thought to do so to secure better chances of survival for their calves in warmer low-latitude wa-  
40 ters [2, 12], and feed on the abundance of copepods, euphausiids (krill) and small fishes at high latitudes  
41 in summer months [13, 14].

42 Low-to-high-to-low latitudinal migrations have been observed directly for many areas of the world’s  
43 oceans (see our Supplementary Information for a bibliography). Yet comparisons between regions are  
44 lacking, and a global synthesis of migration routes would develop our understanding of why certain baleen  
45 whale species, behave in such a (bioenergetically) expensive manner. Here, we develop a macroecological  
46 study, using network theoretic algorithms and output from an Earth System Model (ESM) to infer the  
47 location of migration pathways in the global ocean. ESMs have been developed primarily to explain the



48 major biogeochemical cycles of the earth, ultimately giving us a predictive capacity for future climate  
49 states [15]. To make these calculations, earth-system scientists include descriptions of phytoplankton and  
50 (in some cases) zooplankton dynamics [16]. Here, we use a recent iteration of an ESM [17] that includes  
51 “large zooplankton”, which approximates the dynamics of copepods and euphausiids, as well as providing  
52 information useful for estimating the abundance of small fishes. This ESM data is interpolated to calving  
53 and feeding locations found from a literature review, and then a machine learning algorithm is used  
54 to define potential calving and feeding habitats globally. Major migration pathways between modeled  
55 calving and feeding habitats are then identified using a modified Dijkstra’s algorithm, which finds the  
56 shortest ocean-path between a given calving and feeding location.

57 Estimating the distribution of baleen whale calving and feeding habitats, and migration routes is  
58 not without uncertainty, for it is well known that baleen whale species differ in their use of the ocean.  
59 However, the global scale of our analysis offers a course grained view of species-specific information, and  
60 allows us to look at how baleen whales as a group, might occupy broad, basin-scale, regions of the global  
61 ocean. Furthermore, this large-scale perspective allows us to estimate the impact of humans on baleen  
62 whales, and we do so in the context of whale ship-strikes, thought to be a large source of mortality  
63 for migrating whales [18, 19]: using our modeled migration routes with cargo ship-track data, we infer  
64 hot-spots of potential ship-strikes globally.

## 65 **Methods**

### 66 **The Earth System Model**

67 The Carbon, Ocean Biogeochemistry and Lower Trophics (COBALT) marine ecosystem model provides  
68 the biogeochemical and planktonic food web information that we used to estimate potential whale migra-  
69 tion routes [17]. COBALT is run as part of the Modular Ocean Model (MOM) version 4.1 [20], with 60  
70 year simulations (1948-2008) forced by the Common Ocean-Ice Reference Experiment (CORE-II) data

71 set [21]. The horizontal resolution of the simulation is  $1^\circ$  Latitude/Longitude, except along the equator  
72 where the resolution is refined to  $1/3^\circ$ , and the model uses 50 vertical layers, with a resolution of 10m  
73 over the top 200m.

74 The representation of planktonic food web dynamics within COBALT is based on body-size, and  
75 provides information relevant to our study of baleen whale migration. In particular, medium-sized zoo-  
76 plankton are parameterized to represent small and medium copepods ( $0.2 - 2mm$  in equivalent spherical  
77 diameter or ESD), and large-sized zooplankton are parameterized to represent large copepods and small  
78 euphausiids ( $2 - 20mm$  ESD). Furthermore, COBALT employs a density dependent mortality term for  
79 medium and large zooplankton. This represents the mortality of these zooplankton to higher-predators,  
80 namely small fishes. Although COBALT does not model fish explicitly [17], this implicit representation  
81 of small-fish feeding rates, has been used to model upper trophic levels explicitly [22] and for this appli-  
82 cation, provides information on the spatial distribution of a major source of food for certain baleen whale  
83 species.

## 84 **Baleen whale habitats**

85 Data from the COBALT retrospective ocean-ice ecosystem simulation was used in a classification algo-  
86 rithm to identify likely baleen whale calving and feeding habitats globally. These data were chosen for  
87 their relevance to baleen whale habitats, and include: monthly COBALT temperature data averaged  
88 over the top 200m ( $^\circ C$ ), medium and large zooplankton (copepods and small euphausiids) biomass in-  
89 tegrated over the top 200m ( $g$  carbon  $m^{-2}$ ; our analysis is based on relative difference in zooplankton  
90 abundances, so the exact units are unimportant), medium and large zooplankton mortality rates to small  
91 fishes integrated over the top 200m ( $g$  carbon  $m^{-2} day^{-1}$ ), depth ( $km$ ). All data were taken for the  
92 period 1988-2008. Baleen whales generally calve during the winter, and feed during the summer, and  
93 hence these data were filtered for these times, producing time average austral winters and boreal sum-  
94 mers (june, july, august), and boreal winters and austral summers (november, december, january). For

95 illustrative purposes we show COBALT's annual average sea-surface temperature (Fig. 1a) and average  
96 total abundance of medium and large zooplankton (Fig. 1b).

97 These time-averaged COBALT data fields were then linearly interpolated in space (the modeled data  
98 are on a  $1^\circ$  grid) to feeding and calving locations identified from a literature search: 33 and 36 feeding  
99 and calving sites respectively (Fig. 1). See the Supplementary Information for the bibliography of  
100 compiled literature, and the precise locations. Using this point-data, a machine learning algorithm - a  
101 bagged classification tree - was used to estimate the distribution of feeding and calving habitat at all  
102 other locations globally [23]. The algorithm was used on feeding and calving habitats separately. Taking  
103 feeding habitat as an example: the bagged classification tree required as input, a categorical response  
104 variable - a vector of 1s and 0s relating to those ocean locations where we identified the presence and  
105 absence of feeding respectively, from the literature. The other input is a matrix of predictor variables:  
106 the interpolated COBALT data at the feeding presence and absence locations. The output of the bagged  
107 classification tree, is another vector of 1s and 0s, relating to the classification of all ocean locations as  
108 either feeding habitat or not.

109 Absence locations were created by inspecting the distribution of zooplankton abundances, temper-  
110 ature, depth and irradiance across feeding and calving locations, and then using logical arguments to  
111 select ocean locations beyond the tails of these joint distributions. This essentially identifies areas of  
112 the ocean where calving and/or feeding does not happen. These are more accurately *pseudo-absence*  
113 locations because they are chosen, rather than identified [24], and for each run of any classification tree,  
114 100 pseudo-absence points were selected randomly in this manner. With this information, the bagged  
115 classification tree then predicted the most likely habitat type (calving or feeding, or pseudo-absence) at  
116 every COBALT grid-cell, producing global maps of feeding and calving habitat.

117 Because the pseudo-absence points were chosen randomly, we repeated the classification process two  
118 hundred times, building a distribution of likely feeding, calving and pseudo-absence locations. Finally,  
119 because our concern is with the major migration routes, we isolated the most likely calving and feeding

120 locations by choosing those areas with a 50% or greater probability of feeding or calving classification.  
121 Implicit to the bagged classification process is a k-fold cross-validation test of precision [25]. Here, part of  
122 the training data is left out and validated against, with the classification tree made using the remaining  
123 data. This process is repeated  $k$  times, producing an estimate of the expected classification error.

124 To assess the accuracy of the feeding and calving habitat classification trees, we compared its results  
125 with another set of information gained from the literature - we collected as much information as we could  
126 from peer and non-peer reviewed articles and numerous websites (representing the grey literature; see  
127 supplementary information) on the global distribution of calving and feeding habitats for a number of  
128 baleen whale species. The majority of this information was not geo-referenced in any detail, and as a result  
129 we had to visually overlay their maps, and estimate by-hand the distribution of baleen whale habitats and  
130 migration routes. This information was then compare qualitatively with the habitat distribution maps  
131 produced from the bagged-classficiation tree. This information was also used to divide the global feeding  
132 and calving habitat distributions, produced from the classification trees, into geographically consistent  
133 regions.

## 134 **Baleen whale migration pathways**

135 Once global distributions of baleen whale calving and feeding habitats were made using the bagged-  
136 classification tree, we identified potential migration pathways using a modified Dijkstra's algorithm [26].  
137 This algorithm calculates the shortest-path between two nodes in a network. Here, we considered each  
138 COBALT grid-cell centroid a node in an ocean network. Then the great-circle distance ( $km$ ) between each  
139 grid cell centroid and the centroid of every neighboring cardinal grid cell was calculated. These defined  
140 the edges in the ocean network. The result was a highly sparse matrix (or network): each row representing  
141 a grid-cell, with eight real-valued distances associated with its cardinal neighbors. Connections to land  
142 grid-cells were assigned an infinite distance. Dijkstra's algorithm was then applied to this ocean network,  
143 identifying the shortest over-water or "ocean distance" between two given locations in the sea. However,

144 because the network is constructed over a grid, unrealistic city-block paths were typical solutions. To  
145 solve this problem we added small amounts of white noise to the network edges, and applied Dijkstra's  
146 algorithm a number of times (typically 1000), creating a set of candidate shortest paths. From the set  
147 of candidate shortest paths we calculated the most likely (or expected) shortest path between a given  
148 calving-feeding grid cell pair. Using this information, we identified the shortest path between calving  
149 and feeding regions. This approach is still a heuristic, and as a result the shortest paths are not exact  
150 solutions. An example shortest path is shown in Fig. 2. Here, numerous candidate paths are identified  
151 by the black dots, and the expected shortest path in red. The starting location is off Costa Rica, and the  
152 destination location is off Vancouver Island. The shortest path hugs the coast, and resembles the path  
153 taken by baleen whale species that migrate in this region (for example, blue whales [5]).

## 154 Results

155 When compared qualitatively to the information gained from the literature (Fig. 3), the habitat clas-  
156 sification algorithm identified realistic calving and feeding regions (Fig. 4; green and orange regions  
157 respectively; habitat regions are the same across all panels), and average cross-validation error for both  
158 calving and feeding trees was satisfyingly low (0.07 and 0.05 respectively after 50 trees; see Supplementary  
159 Information Fig. S1). Feeding habitats were identified mostly at high latitude: the Sea of Okhotsk, the  
160 Bering sea, the northwest Atlantic, the northeast Atlantic, Greenland, the North Sea, the Barents sea, the  
161 Crozet Islands, the south coast of Australia, southern New Zealand, the Patagonia Shelf and the whole of  
162 Antarctica. Calving habitats were found predominantly at in shallow, warm, low latitudes regions: Baja  
163 California, the off Costa Rica and Ecuador, off northwest Africa below the Cape Verde islands, the Gulf  
164 of Guinea, off the west-coast of Madagasca in the Mozambique channel, in the Arabian Sea, the Bay of  
165 Bengal, areas off the northwest and northeast coasts of Australia, and Fiji. These feeding and calving  
166 distributions map well to areas identified qualitatively from the peer-reviewed and grey literature (Fig.

167 3).

168 The partitioning of global habitat into geographically consistent regions, based on qualitative infor-  
169 mation gained from the literature, is shown in Fig. 4 (regions in different shades of green and orange).  
170 For example, the Hawaiian Islands, the Gulf of California, and the eastern tropical Pacific were all divided  
171 into separate calving regions. Similarly for the distribution of feeding habitat, areas such as Antarctica,  
172 the Bering Sea, and the North Sea are separated into distinct feeding regions. While agreement on a  
173 regional scale is good, there are a few noticeable calving regions not seen in the literature (Fig. 3). For  
174 example northern New Zealand and the Gulf of Mexico are classified as calving habitat, but there is little  
175 evidence for this [27]. Similarly for feeding grounds, the classification tree identified the southern half of  
176 New Zealand, but there was little evidence in the literature that this is a major feeding area for baleen  
177 whales. However, that is to say there is little evidence that *contemporary* whale distributions cover these  
178 areas [27]. Both are interesting as they constitute potential feeding and calving regions for right whales,  
179 species which have been essentially exterminated and may show significant range contraction. There is  
180 evidence that Southern New Zealand was a feeding ground and Northern New Zealand was a calving  
181 area for Southern Right Whales before they were almost wiped out [28]. Similarly, the Gulf of Mexico  
182 may have been an extension of the Florida East Coast calving area for Northern Right Whales, with a  
183 few individuals spotted in the GOM in the past several decades. Considering there are only about 400  
184 Northern Right Whales currently, it seem highly plausible that the GOM/Caribbean was an important  
185 calving area for them when they numbered in the 10's of thousands [29].

186 Globally, the first, second and third shortest paths that minimize over-water distance are shown in  
187 Fig. 4a, b & c respectively. The maximum, minimum and mean path lengths (*km*), for these three sets  
188 are: first - 7291, 696, 3037; second - 9469, 2091, 5014; third - 10828, 2414, 6948. Beyond these simple  
189 statistics, what is evident are the realistic migration routes. These shortest paths between every calving  
190 region and their three nearest feeding regions describe all migration routes identified in the grey literature  
191 (Fig. 3). For example, from Hawaii, the three nearest feeding regions are the Sea of Okhotsk, the Bering

192 Sea, and the waters off the northwest US and Canada. From the southeast Caribbean, shortest migration  
193 routes connect to the waters of the northeast US and Canada, to Greenland, and to the North Sea. In the  
194 southern hemisphere, many calving locations connect to the Southern Ocean and Antarctica, traversing  
195 many degrees of latitude, for little change in longitude. There are however shortest paths that traverse  
196 several degrees on longitude. These are most commonly the third shortest paths, for example connecting  
197 Madagascar and northwest Australia, with the Crozet Islands (Fig. 4c).

## 198 Discussion

199 Baleen whale feeding and calving regions were identified, using peer-reviewed and grey literature infor-  
200 mation on calving and feeding locations, within a bagged-classification tree. Then, using a modified  
201 Dijkstra's algorithm, we identified paths that minimized the ocean distance between feeding and calving  
202 regions. Both the global distribution of feeding and calving habitats and the shortest paths connecting  
203 them, map well to the known distributions of these habitats and migration routes for certain species. Our  
204 results suggest that baleen whale migration has evolved to minimize ocean-distances between calving and  
205 feeding habitats. Other factors, such as predator avoidance (e.g. from killer whales) are likely to play a  
206 role too in shaping where baleen whales go, but at smaller spatial scales [12].

207 This analysis is global in scale, and baleen whales were analyzed as a group. This latter step places  
208 constraints on our analysis, as it is known that migration patterns, and behavior in general, can differ  
209 greatly between whale-species. This is reflected in the specificity of most whale-movement data, which  
210 is typically collected for particular individuals and groups of certain whale species, in specific regions,  
211 where focused observational and tagging efforts can give fine-scale knowledge of movements [5, 8]. The  
212 global-scale analysis presented herein lacks the detail of regional, species specific studies, however, it  
213 provides a coarser global perspective on large-scale movements of baleen whales and the mechanisms  
214 underlying them. Indeed, the large scale of our analysis does not preclude species-specific use: different

215 baleen whale species show common reliance on broad ocean areas (at scales:  $> 1000s\ km$ ) citeGREG2001,  
216 and hence our modeled baleen whale habitat maps and migration routes may capture patterns that are  
217 general across species. Furthermore, simply having a global atlas of possible migration routes allows us  
218 to gauge how humans may have impacted whale migrations around the world.

219 As an example, we use our global atlas of baleen whale migration to identify hot-spots of potential  
220 ship strikes. Ship strikes are thought to be a large source of mortality for some whale groups [18, 19].  
221 But like assessments of migration, most analyses of ship strikes are at regional scales. In contrast,  
222 our work here can help identify global patterns of ship strike potential. Using information from the  
223 PASTA MARE project [30], we interpolated normalized shipping density (a score between [0,1]; see Fig.  
224 S2 for a detailed description) to locations along the major whale migration pathways, resulting in the  
225 identification of potential ship-strike hot-spots (Fig. 5). Japanese waters emerge as having the highest  
226 strike risk for a given whale migrating in this area. Secondary hot-spots occur in Indonesian waters,  
227 off South Africa, off Puerto Rico and off New Foundland, Canada. Although this brief analysis looks  
228 only at ship strike potential along migration routes, ignoring strikes in calving and feeding regions, this  
229 information can be useful for developing global conservation and management priorities. Two important  
230 caveats to this analysis is that first, these strike risk estimates ignore any regional-scale measures to  
231 reduce risk, for example as has been successfully done for the North Atlantic Right Whale [31]. Second,  
232 we assume a *pristine* ocean, for we do not account for the effect of historic whaling on contemporary whale  
233 densities. Thus, inferring ship-strike potential in this way is likely inaccurate due to the loss of migration  
234 routes/populations from whaling [9]. Indeed, a worthwhile effort is the comparison of contemporary  
235 migration routes with our estimates of migration in a pristine ocean. Through this, one can identify (or  
236 at least hypothesize for) the loss of particular migration routes.

237 Looking to the past is important, but equally so is to understand how humans may continue to impact  
238 whale migration in the future. Our feeding and calving habitat maps, and migration routes were trained  
239 on Earth System Model data, averaged over the period 1988-2008. As a result our modeled distributions



240 of feeding and calving habitats are specific to this period. It is possible too, to use our techniques to  
241 project how habitat distributions and migration routes might change in the future. The Earth System  
242 Model data used in this analysis, as well as looking back in time in hindcast simulations, also look forward  
243 in time and project the distribution of oceanographic variables such as temperature and the abundance  
244 of zooplankton [15,17]. Thus, with this information it is possible, in future work, to estimate how baleen  
245 whale migration feeding and calving habitats might move under different future climate scenarios.

246 To improve the accuracy of these future projections, especially the estimates of migration routes, there  
247 are several modifications that could be made to our *basic* approach. We say basic because our migration  
248 route-finding algorithm does not include any biological information. Hence, we cannot answer the question  
249 of what condition whale individuals might be in, for example, if calving and feeding habitats move further  
250 apart in the future, or if their quality (e.g. the abundance of large zooplankton or krill) might diminish.  
251 It is critical to do so because individual condition can have a highly non-linear relationship with travel-  
252 distance/time [32], and slight increases in the shortest migration path distance, could be detrimental to  
253 whale health, rendering certain migration routes impossible. The experience along a migration route is  
254 important too. For example, it is expected that areas of the surface ocean are likely to warm in the  
255 coming decades. This may incur a significant bioenergetic cost on migrating whales, as biomass specific  
256 respiration rates are positively related to temperature [33]. In other words, baleen whales are likely to  
257 expend more energy on their annual migrations in the future, and the consequences of this change are  
258 unknown.

259 In addition, there are several algorithmic modifications to our approach that can be made. First, we  
260 have only identified paths that minimize ocean distance. It is possible too, to find paths between two  
261 locations in the sea that minimize travel-time. We have done so in our context (Fig. S3), assuming that  
262 baleen whales swim with a constant speed of  $80 \text{ km day}^{-1}$  [5], and instead of distances as network edges  
263 (see methods) we assign travel times, accounting for ocean currents. Applying Dijkstra's algorithm to  
264 this network creates solutions to what is known as the *Zermelo navigation problem*, that is, finding the

265 path that minimizes travel time between two locations in the sea [34]. The resulting migration routes  
266 are shown in Fig. S3, and we find little difference between these and the distance minimizing routes.  
267 This is due to the fast swimming speeds of baleen whales. However, solutions to Zermelo's problem for  
268 other species that swim more slowly, for example for marine turtles [34], have identified multiple possible  
269 migration routes, depending on the movement rule employed. This brief analysis reveals the numerous  
270 ways in which potential migration routes can be identified, and how this information can be used to  
271 develop hypotheses about the optimal movement strategies that marine species have evolved.

272 In summary, we estimated the distribution of baleen whale feeding and calving habitats globally, and  
273 the migration routes connecting them. We have shown evidence that baleen whales, as a group, have  
274 migration routes that minimize distance (and/or travel time), and we have also discussed that the main  
275 utility of our macroecological analyses is in the generation of hypotheses and questions. For example, do  
276 baleen whales minimize travel distance or time? Answers to these questions may come from evolutionary  
277 agent-based simulations that have been employed in idealized settings to answer similar questions [35].  
278 Indeed, combining these tools with Earth System Model data, will better position us to understand where  
279 baleen whales migrate to and from, how they do it, and why.

## 280 **Acknowledgments**

281 We would like to thank Andre Boustany, Jorge Sarmiento, Simon Levin, Malin Pinsky, Rebecca Asch and  
282 Jodi Elliott for their help in preparing this work. JW was part funded by the Nippon Foundation (NF)  
283 Nereus Program. JW was also funded by the NSF Coupled Natural-Human Systems grant GEO-1211972.  
284 BF was funded by Princeton University's Grand Challenges program.

## References

- 285  
286 1. Pike GC (1962) Migration and feeding of the gray whale (*Eschrichtius gibbosus*). Journal of the  
287 Fisheries Board of Canada .
- 288 2. Corkeron P, Connor R (1999) Why do baleen whales migrate? Marine Mammal Science 15:  
289 1228–1245.
- 290 3. Calambokidis J, Barlow J (2004) Abundance of blue and humpback whales in the eastern north  
291 pacific estimated by capture-recapture and line-transect methods. Marine Mammal Science 20:  
292 63–85.
- 293 4. Dalla Rosa L, Secchi ER, Maia YG, Zerbini AN, Heide-Jorgensen MP (2008) Movements of satellite-  
294 monitored humpback whales on their feeding ground along the Antarctic Peninsula. Polar Biology  
295 31: 771–781.
- 296 5. Bailey H, Mate BR, Palacios DM, Irvine L, Bograd SJ, et al. (2010) Behavioural estimation of  
297 blue whale movements in the Northeast Pacific from state-space model analysis of satellite tracks.  
298 Endangered Species Research 10: 93–106.
- 299 6. Boye TK, Simon M, Madsen PT (2010) Habitat use of humpback whales in Godthaabsfjord, West  
300 Greenland, with implications for commercial exploitation. Journal of the Marine Biological Asso-  
301 ciation of the United Kingdom 90: 1529–1538.
- 302 7. Fretwell PT, Staniland IJ, Forcada J (2014) Whales from space: counting southern right whales  
303 by satellite. PloS one 9: e88655.
- 304 8. Rosenbaum HC, Maxwell SM, Kershaw F, Mate B (2014) Long-Range Movement of Humpback  
305 Whales and Their Overlap with Anthropogenic Activity in the South Atlantic Ocean. Conservation  
306 biology: the journal of the Society for Conservation Biology 28: 604–615.

- 307 9. Smith TD, Reeves RR, Josephson EA, Lund JN (2012) Spatial and Seasonal Distribution of Amer-  
308 ican Whaling and Whales in the Age of Sail. PLoS ONE 7: e34905.
- 309 10. Rasmussen K, Palacios DM, Calambokidis J, Saborío MT, Dalla Rosa L, et al. (2007) Southern  
310 Hemisphere humpback whales wintering off Central America: insights from water temperature into  
311 the longest mammalian migration. Biology Letters 3: 302–305.
- 312 11. Mizroch S, Rice D, Breiwick J (1984) The sei whale, *Balaenoptera borealis*. Marine Fisheries  
313 Review 46: 25–29.
- 314 12. Jefferson TA, Stacey PJ, Baird RW (1991) A review of Killer Whale interactions with other marine  
315 mammals: predation to coexistence. Mammal Review 21: 151–180.
- 316 13. Kann LM, Wishner K (1995) Spatial and temporal patterns of zooplankton on baleen whale feeding  
317 grounds in the southern Gulf of Maine. Journal of Plankton Research 17: 235–262.
- 318 14. Branch T, Stafford KM, Palacios DM, Allison C, Bannister JL, et al. (2007) Past and present distri-  
319 bution, densities and movements of blue whales *Balaenoptera musculus* in the Southern Hemisphere  
320 and northern Indian Ocean. Mammal Review 37: 116–175.
- 321 15. Dunne JP, John JG, Adcroft AJ, Griffies SM, Hallberg RW, et al. (2012) GFDL’s ESM2 Global  
322 Coupled Climate–Carbon Earth System Models. Part I: Physical Formulation and Baseline Simu-  
323 lation Characteristics. Journal Of Climate 25: 6646–6665.
- 324 16. Stock CA, Alexander MA, Bond NA, Brander KM, Cheung WWL, et al. (2011) On the use  
325 of IPCC-class models to assess the impact of climate on Living Marine Resources. Progress In  
326 Oceanography 88: 1–27.
- 327 17. Stock CA, Dunne JP, John JG (2014) Global-scale carbon and energy flows through the marine  
328 planktonic food web: An analysis with a coupled physical–biological model. Progress In Oceanog-  
329 raphy 120: 1–28.

- 330 18. Knowlton AR, Kraus SD (2001) Mortality and serious injury of northern right whales (*Eubalaena*  
331 *glacialis*) in the western North Atlantic Ocean. *Journal of Cetacean Research and Management*  
332 (Special Issue) 2: 193–208.
- 333 19. Jensen AS, Silber GK, Calambokidis J (2003) Large whale ship strike database. NOAA Technical  
334 Memorandum NMFS-OPR-: 37.
- 335 20. Griffies SM (2012) Elements of the Modular Ocean Model (MOM): 2012 release. GFDL Ocean  
336 Group Technical Report No 7 : 1–631.
- 337 21. Large WG, Yeager SG (2008) The global climatology of an interannually varying air–sea flux data  
338 set. *Climate Dynamics* 33: 341–364.
- 339 22. Watson J, Favetta B, CA S (In press) Exploring the role of movement in determining the global dis-  
340 tribution of marine biomass using a coupled hydrodynamic – size-based ecosystem model. *Progress*  
341 *in Oceanography* .
- 342 23. Prasad AM, Iverson LR, Liaw A (2006) Newer Classification and Regression Tree Techniques:  
343 Bagging and Random Forests for Ecological Prediction. *Ecosystems* 9: 181–199.
- 344 24. Engler R, Guisan A, Rechsteiner L (2004) An improved approach for predicting the distribution of  
345 rare and endangered species from occurrence and pseudo-absence data. *Journal of Applied Ecology*  
346 41: 263–274.
- 347 25. Elith J, Leathwick JR, Hastie T (2008) A working guide to boosted regression trees. *The Journal*  
348 *of Animal Ecology* 77: 802–813.
- 349 26. Golden B (1976) Shortest-path algorithms: A comparison. *Operations Research* : 1164–1168.
- 350 27. Constantine R, Russell K (2007) Photo-identification of humpback whales in New Zealand waters  
351 and their migratory connections to breeding grounds of Oceania. *Marine Mammal Science* 23:  
352 715–720.

- 353 28. Baker CS, Patenaude NJ, Bannister JL, Robins J, Kato H (1999). Distribution and diversity  
354 of mtDNA lineages among southern right whales (*Eubalaena australis*) from Australia and New  
355 Zealand. doi:10.1007/s002270050519.
- 356 29. Ward-Geiger L, Knowlton AR, Amos AF, Pitchford TD, MaseGuthrie B, et al. (2011). Recent  
357 Sightings of the North Atlantic Right Whale in the Gulf of Mexico.
- 358 30. Eiden G, Martinsen T (2010) Maritime traffic density - results of PASTA MARE project. Technical  
359 Note 41 Vessel Density Mapping Issue 4 Preparatory Action for Assessment of the Capacity of  
360 Spaceborne Automatic Identification System Receivers to Support EU Maritime Policy .
- 361 31. Conn PB, Silber GK (2013) Vessel speed restrictions reduce risk of collision-related mortality for  
362 North Atlantic right whales. *Ecosphere* 4: 1–15.
- 363 32. Wiedenmann J, Cresswell KA, Goldbogen J, Potvin J, Mangel M (2011) Exploring the effects of  
364 reductions in krill biomass in the Southern Ocean on blue whales using a state-dependent foraging  
365 model. *Ecological Modelling* 222: 3366–3379.
- 366 33. Brown J, Gillooly J, Allen AP, Savage VM, West G (2004) Toward a metabolic theory of ecology.  
367 *Ecology* 85: 1771–1789.
- 368 34. Hays GC, Christensen A, Fossette S, Schofield G, Talbot J, et al. (2014) Route optimisation and  
369 solving Zermelo’s navigation problem during long distance migration in cross flows. *Ecology Letters*  
370 17: 137-143.
- 371 35. Shaw AK, Couzin ID (2013) Migration or Residency? The Evolution of Movement Behavior and  
372 Information Usage in Seasonal Environments. *The American Naturalist* 181: 114–124.
- 373 36. Mikhalev YA (1997) Humpback whales *Megaptera novaeangliae* in the Arabian Sea. *Marine Ecology*  
374 *Progress Series* 149: 13–21.

375 **Figures**

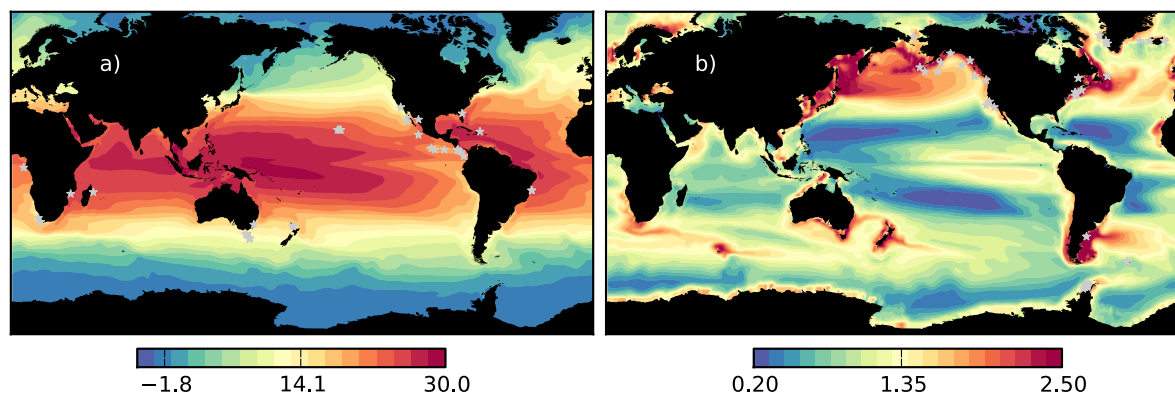

**Figure 1.** (a) Annual average sea surface temperature ( $^{\circ}C$ ) and (b) the annual average total abundance of medium and large zooplankton ( $g$  carbon  $m^{-2}$ ) from COBALT. Data are integrated over the top 200m, and baleen whale calving and feeding locations overlaid on Fig. 1a and b respectively (grey stars)

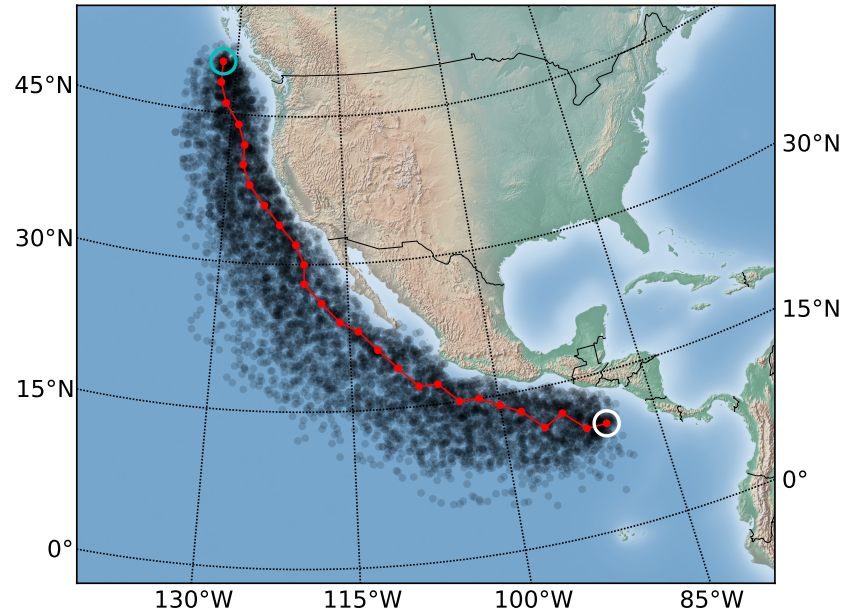

**Figure 2.** An outline of our route-finding algorithm. Black dots comprise locations along multiple candidate shortest paths, found using our modified Dijkstra's algorithm, connecting the starting location (white circle) and terminus (blue circle). The red line is the expected shortest route, over all candidate shortest paths.



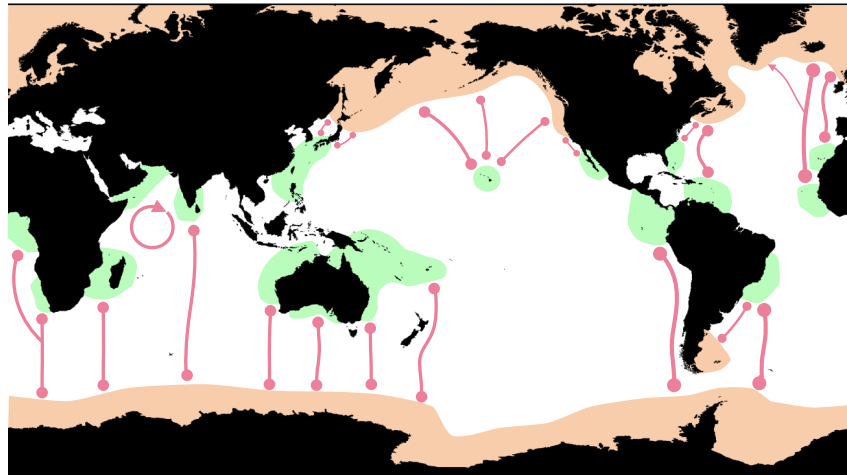

**Figure 3.** The distribution of baleen whale calving (green) and feeding (orange) habitats, and major migration routes, estimated qualitatively from the literature (peer and grey literature, as well as numerous website; see supplementary information). The major migration routes are generalizations of many specific regional examples, and are only meant to describe the major patterns of baleen whale migration at a global scale. Further, these routes are used to connect the feeding and calving regions, we do not attempt to describe whale movement within these habitats. The circular arrow in the Indian ocean identifies a resident group found there [36].

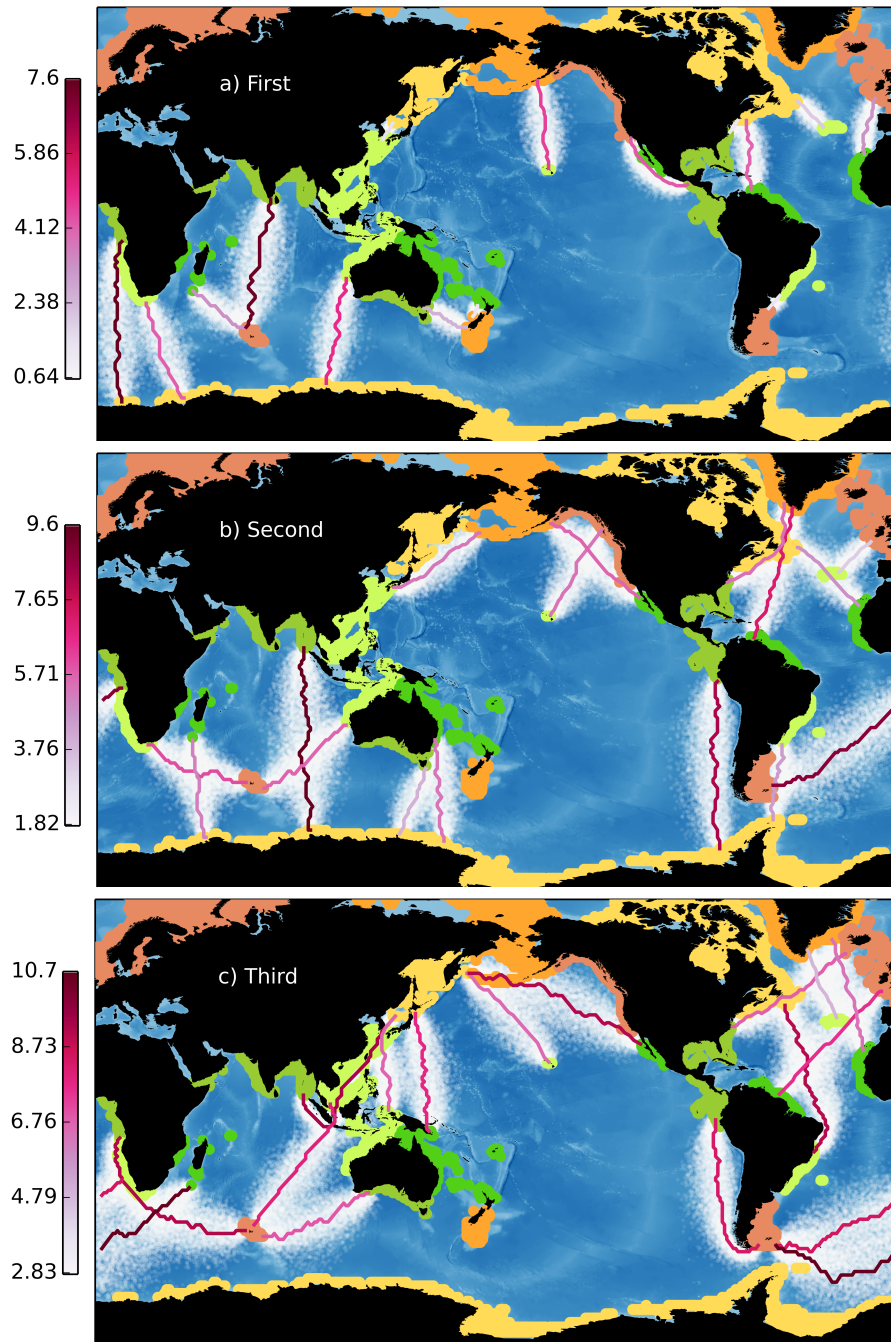

**Figure 4. First (a), second (b) and third (c) shortest migration paths between all calving and feeding regions, identified using our modified Dijkstra's algorithm.** Calving regions are identified in green, the feeding regions in orange. The different shades of green and orange are used to simply differentiate the regions. Shortest paths are those that minimize ocean distance (colorbar: 1000's km). These paths are not exact solutions to the shortest-path problem, hence there are curves and bends to them. However, these do not impact the comparison of migration routes and distances between regions of the world's oceans.

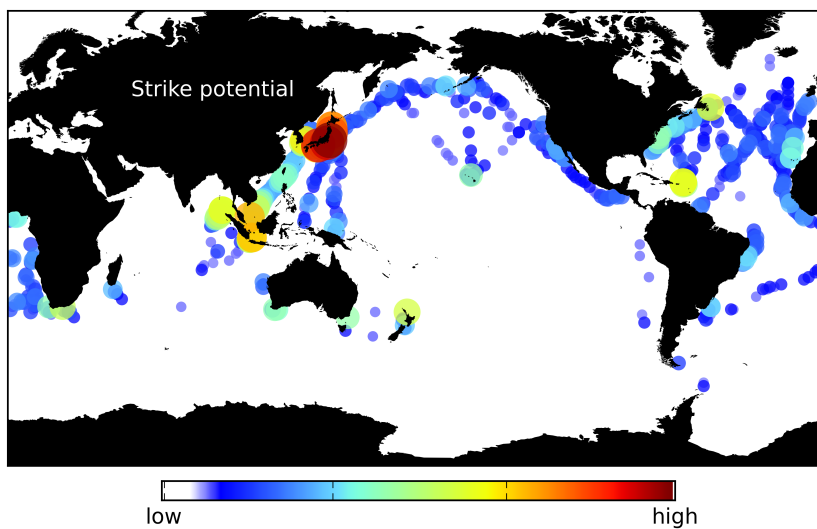

**Baleen whale strike potential.** Along with color, the size of the dots denotes whale strike potential: the larger the higher potential. See Fig. S2 for a description of the shipping data.

## Supplementary Information 1

### Literature Review

We collected information on the distribution of baleen whale calving and feeding habitats, and their migration routes. Quantitative - geo-referenced - information was obtained from peer-reviewed literature and is listed in Table A1, with corresponding articles in the subsequent bibliography. Qualitative information - non geo-referenced - from the grey-literature: websites and non-peer reviewed publications are listed at the end.

| Habitat type | Latitude | Longitude | Species  | Reference |
|--------------|----------|-----------|----------|-----------|
| Calving      | 5        | -80       | Humpback | 1         |
| Calving      | 18       | -108      | Humpback | 2         |
| Calving      | 20       | -150      | Humpback | 2         |
| Calving      | 20       | -160      | Humpback | 2         |
| Calving      | 20       | -156      | Humpback | 11        |
| Calving      | -16      | -38       | Humpback | 13        |
| Calving      | -32      | 17        | Right    | 14        |
| Calving      | -18      | 37        | Humpback | 15        |
| Calving      | -2       | 8         | Humpback | 16        |
| Calving      | -17      | 51        | Humpback | 16        |
| Calving      | 9        | -83       | Humpback | 17        |
| Calving      | 9        | -84       | Humpback | 17        |
| Calving      | 9        | -84       | Humpback | 17        |
| Calving      | 8        | -82       | Humpback | 17        |
| Calving      | 9        | -84       | Humpback | 17        |
| Calving      | -41      | 145       | Right    | 18        |
| Calving      | -36      | 175       | Right    | 18        |
| Calving      | -36      | 150       | Right    | 18        |
| Calving      | -34      | 18        | Right    | 18        |
| Calving      | -43      | 147       | Right    | 18        |
| Calving      | -37      | 174       | Right    | 18        |
| Calving      | -41      | 145       | Right    | 18        |
| Calving      | -43      | 148       | Right    | 18        |
| Calving      | 9        | -92       | Blue     | 19        |
| Calving      | 9        | -98       | Blue     | 19        |
| Calving      | 28       | -115      | Blue     | 20        |
| Calving      | 26       | -115      | Blue     | 20        |
| Calving      | 34       | -119      | Blue     | 20        |
| Calving      | 10       | -100      | Blue     | 20        |
| Calving      | 31       | -81       | Right    | 20        |

|         |     |      |                               |    |
|---------|-----|------|-------------------------------|----|
| Calving | -42 | -63  | Right                         | 23 |
| Calving | -16 | -38  | Humpback                      | 24 |
| Feeding | 35  | -125 | Humpback                      | 1  |
| Feeding | 60  | -147 | Humpback                      | 2  |
| Feeding | 55  | -140 | Humpback                      | 2  |
| Feeding | 40  | -70  | Humpback                      | 3  |
| Feeding | 50  | -50  | Humpback                      | 3  |
| Feeding | 65  | -15  | Humpback                      | 3  |
| Feeding | 67  | -55  | Humpback                      | 4  |
| Feeding | 64  | -51  | Humpback                      | 5  |
| Feeding | 65  | -30  | mix (fin,blue, sei, humpback) | 6  |
| Feeding | 65  | -51  | mix (fin,blue, sei, humpback) | 7  |
| Feeding | 64  | -50  | mix (fin,blue, sei, humpback) | 8  |
| Feeding | 50  | -50  | mix (humpback, fin, minke)    | 9  |
| Feeding | -64 | -63  | Humpback                      | 10 |
| Feeding | -64 | -62  | Humpback                      | 12 |
| Feeding | -64 | -63  | Humpback                      | 17 |
| Feeding | -65 | -65  | Humpback                      | 17 |
| Feeding | -65 | -63  | Humpback                      | 17 |
| Feeding | -65 | -64  | Humpback                      | 17 |
| Feeding | -65 | -62  | Humpback                      | 17 |
| Feeding | 41  | -69  | Right                         | 21 |
| Feeding | 65  | -24  | Minke                         | 22 |
| Feeding | -54 | -38  | Right                         | 23 |
| Feeding | -63 | -62  | Humpback                      | 12 |
| Feeding | 50  | -132 | Gray                          | 25 |
| Feeding | 67  | -170 | Gray                          | 26 |
| Feeding | 49  | -68  | mix(fin, minke)               | 27 |
| Feeding | 42  | -70  | Humpback                      | 28 |
| Feeding | 43  | -66  | Humpback                      | 28 |
| Feeding | 34  | -120 | Humpback                      | 28 |
| Feeding | 37  | -123 | Humpback                      | 28 |
| Feeding | 48  | -125 | Humpback                      | 28 |
| Feeding | 57  | -135 | Humpback                      | 28 |
| Feeding | 56  | -153 | Humpback                      | 28 |
| Feeding | 52  | -155 | Humpback                      | 28 |
| Feeding | 52  | -163 | Humpback                      | 28 |
| Feeding | 54  | -166 | Humpback                      | 28 |

Table 1: Habitat type, location, species and reference number for literature identifying baleen whale calving and/or feeding locations. References are listed in the bibliography below.

## Bibliography

1. Calambokidis, J., et al. (2000). Migratory destinations of humpback whales that feed off California, Oregon and Washington. *Marine Ecology Progress Series*, 192, 295-304.
2. Calambokidis, J., et al. (2001). Movements and population structure of humpback whales in the north pacific. *Marine Mammal Science*, 17(4), 769-794.
3. Stevick, P. T., et al. (2003). Segregation of migration by feeding ground origin in North Atlantic humpback whales ( *Megaptera novaeangliae*). *Journal of Zoology*, 259(3), 231-237. doi:10.1017/S0952836902003151
4. Simon, Malene Juul. "The sounds of whales and their food: Baleen whales, their foraging behaviour, ecology and habitat use in an arctic habitat." PhD dissertation., Aarhus Universitet Aarhus University, Department of Biological Sciences, Zoophysiology, 2010.
5. Boye, T. K., et al. (2010). Habitat use of humpback whales in Godthaabsfjord, West Greenland, with implications for commercial exploitation. *Journal of the Marine Biological Association of the United Kingdom*, 90(08), 1529-1538.
6. Heide-Jorgensen, M. P., & Simon, M. J. (2007). Estimates of large whale abundance in Greenlandic waters from a ship-based survey in 2005. *Journal of Cetacean Research and Management*, 9(2), 95-104.
7. Heide-Jorgensen, M. P., & Laidre, K. L. (2013). Surfacing time, availability bias, and abundance of humpback whales in West Greenland. *International Whaling Commission*, 65a(AWMP1), 1-13.
8. Heide-Jorgensen, M. P., et al. (2007). Increasing abundance of bowhead whales in West Greenland. *Biology Letters*, 3(5), 577-580. doi:10.1098/rsbl.2007.0310
9. Piatt, J. F., et al. (1989). Baleen whales and their prey in a coastal environment. *Canadian Journal of Zoology*, 67(6), 1523-1530.
10. Friedlaender, A. S., et al. (2008). The effects of prey demography on humpback whale (*Megaptera novaeangliae*) abundance around Anvers Island, Antarctica. *Polar Biology*, 31(10), 1217-1224.

11. Cartwright, R., & Sullivan, M. (2009). Behavioral ontogeny in humpback whale (*Megaptera novaeangliae*) calves during their residence in Hawaiian waters. *Marine Mammal Science*, 25(3), 659-680.
12. Dalla Rosa, L., et al. (2008). Movements of satellite-monitored humpback whales on their feeding ground along the Antarctic Peninsula. *Polar Biology*, 31(7), 771-781.
13. Lunardi, D. G., et al. (2010). Behavioural strategies in humpback whales, *Megaptera novaeangliae*, in a coastal region of Brazil. *Journal of the Marine Biological Association of the United Kingdom*, 90(08), 1693-1699.
14. Fortune, S. (2012). North Atlantic right whale growth and energetics. Masters Thesis. Department of Zoology. The University of British Columbia.
15. Pomilla, C., & Rosenbaum, H. C. (2005). Against the current: an inter-oceanic whale migration event. *Biology Letters*, 1(4), 476-479.
16. Pomilla, C., & Rosenbaum, H. C. (2006). Estimates of relatedness in groups of humpback whales (*Megaptera novaeangliae*) on two wintering grounds of the Southern Hemisphere. *Molecular Ecology*, 15(9), 2541-2555.
17. Rasmussen, K., Palacios, D. M., Calambokidis, J., Saboro, M. T., Dalla Rosa, L., Secchi, E. R., et al. (2007). Southern Hemisphere humpback whales wintering off Central America: insights from water temperature into the longest mammalian migration. *Biology Letters*, 3(3), 302-305.
18. Kemper, C. M. (2002). Distribution of the pygmy right whale, *Caperea marginata*, in the Australasian region. *Marine Mammal Science*, 18(1), 99-111.
19. Calambokidis, J., & Barlow, J. (2004). Abundance of blue and humpback whales in the eastern north pacific estimated by capture-recapture and line-transect methods. *Marine Mammal Science*, 20(1), 63-85.
20. Mate, B. R., Lagerquist, B. A., & Calambokidis, J. (1999). movements of north pacific blue whales during the feeding season off southern california and their southern fall migration. *Marine Mammal Science*, 15(4), 1246-1257.
21. Kann, L. M., & Wishner, K. (1995). Spatial and temporal patterns of zooplankton on baleen whale feeding grounds in the southern Gulf of Maine. *Journal of Plankton Research*, 17(2), 235-262.

22. Christiansen, F., Rasmussen, M., & Lusseau, D. (2013). Whale watching disrupts feeding activities of minke whales on a feeding ground. *Marine Ecology Progress Series*, 478, 239-251.
23. Valenzuela, L. O., Sironi, M., Rowntree, V. J., & Seger, J. (2009). Isotopic and genetic evidence for culturally inherited site fidelity to feeding grounds in southern right whales (*Eubalaena australis*). *Molecular Ecology*, 18(5), 782-791.
24. Danilewicz, D., Tavares, M., Moreno, I. B., Ott, P. H., & Trigo, C. C. (2009). Evidence of feeding by the humpback whale (*Megaptera novaeangliae*) in mid-latitude waters of the western South Atlantic. *Marine Biodiversity Records*, 2, e88.
25. Pike, G. C. (1962). Migration and feeding of the gray whale (*Eschrichtius gibbosus*). *Journal of the Fisheries Board of Canada*.
26. Sobolevskii, E. I., Yakovlev, Y. M., & Kusakin, O. G. (2000). Some data on macrobenthos composition on feeding grounds of the gray whale (*Eschrichtius gibbosus* Erxl., 1777) on the northeastern Sakhalin shelf. *Russian Journal of Ecology*, 31(2), 126-128.
27. Simard, Y., Lavoie, D., & Saucier, F. J. (2002). Channel head dynamics: capelin (*Mallotus villosus*) aggregation in the tidally driven upwelling system of the Saguenay - St. Lawrence Marine Park's whale feeding ground. *Canadian Journal of Fisheries and Aquatic Sciences*, 59(2), 197-210. doi:10.1139/f01-210
28. Elfes, C. T., Vanblaricom, G. R., Boyd, D., Calambokidis, J., Clapham, P. J., Pearce, R. W., et al. (2010). Geographic variation of persistent organic pollutant levels in humpback whale (*Megaptera novaeangliae*) feeding areas of the North Pacific and North Atlantic. *Environmental Toxicology and Chemistry*, 29(4), 824-834. doi:10.1002/etc.110



## Whale Migration Websites

[w3.shorecrest.org](http://w3.shorecrest.org),

[www.whales.org.au](http://www.whales.org.au)

[www.ecy.wa.gov](http://www.ecy.wa.gov)

[www.learner.org](http://www.learner.org),

[www.marinebio.net](http://www.marinebio.net)

[www.whalesbc.com](http://www.whalesbc.com)

[www.ocean-institute.org](http://www.ocean-institute.org)

[www.whoi.edu](http://www.whoi.edu)

[www.wildhawaii.org](http://www.wildhawaii.org)

[www.mersea.com](http://www.mersea.com)

[www.nature.nps.gov](http://www.nature.nps.gov)

[www.kids.britannica.com](http://www.kids.britannica.com)

[www.library.arcticportal.org](http://www.library.arcticportal.org)

[www.science.kqed.org](http://www.science.kqed.org)

[www.bajainsider.com](http://www.bajainsider.com)

[www.csiwhalesalive.org](http://www.csiwhalesalive.org)

[http://nationalgeographic.pny.com/Maps\\_home.aspx?Category=Maps](http://nationalgeographic.pny.com/Maps_home.aspx?Category=Maps),

[www.coastalstudies.org](http://www.coastalstudies.org)

[www.phys.org](http://www.phys.org)

[www.scrippsblogs.ucsd.edu](http://www.scrippsblogs.ucsd.edu),

[www.buzzle.com](http://www.buzzle.com)

[www.whalemuseum.is](http://www.whalemuseum.is)

[www.beforeitsgone.com.au](http://www.beforeitsgone.com.au)

<http://www.apex-environmental.com/>

<http://www.ecoflores.org/en/marine+conservation/supporting+foreign+ngo/apex/>

## Supplementary Figures

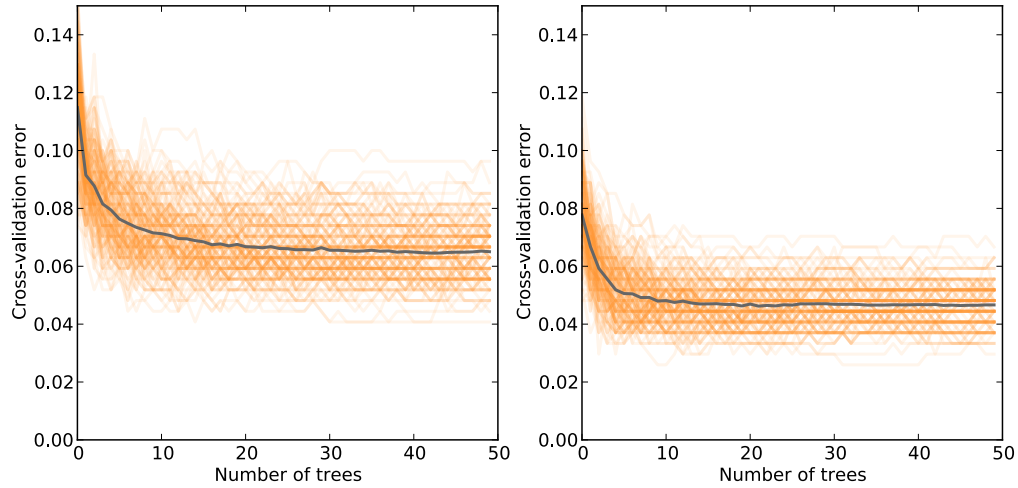

Figure S1: (a). Habitat modeling cross-validation error for calving (left) and feeding (right) habitats. The classification tree algorithm is applied multiple times (orange lines), as pseudo-absence locations are chosen at random. This results in an expected cross-validation error (grey line).

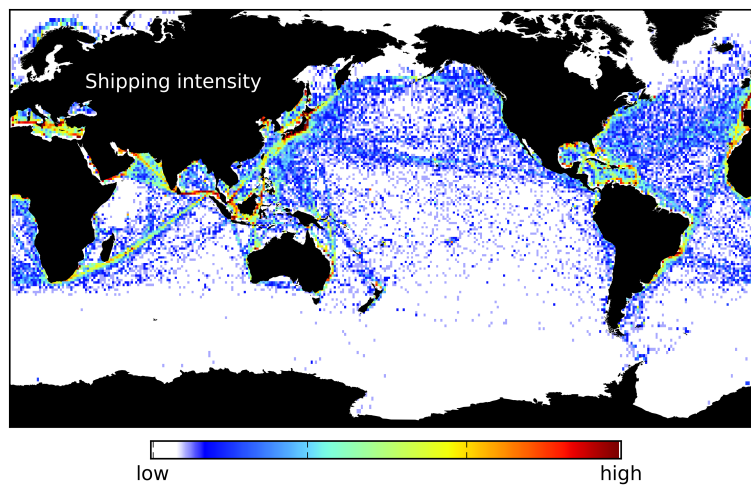

Figure S2: Ship density from the PASTA MARE project. This is defined as the average number of vessels within a grid cell, based on 10 global Satellite-Automatic Identification System (S-AIS) scenes. Each global S-AIS scene retains one position report per vessel within a time frame of 8 days. The data used covers the period from 1 January 2010 – 31 March 2010. We log-transformed this data then normalized it to [0,1], before interpolating to locations along the major migration pathways, inferred from our ocean-distance minimizing algorithm. For more information on this data see <https://webgate.ec.europa.eu/maritimeforum/content/1603>

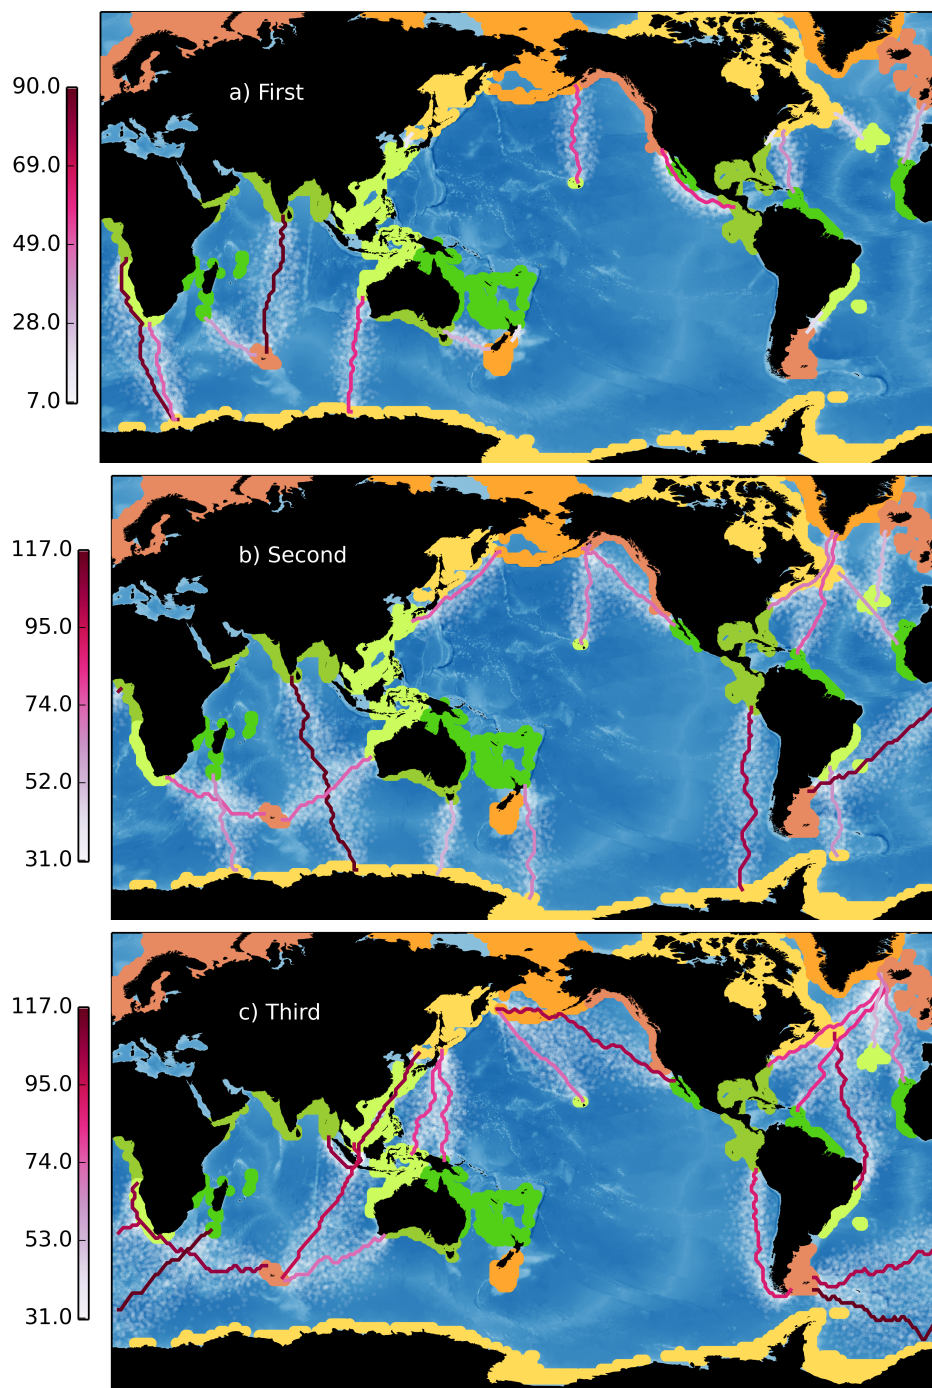

Figure S3: First (a), second (b) and third (c) shortest migration paths between all calving and feeding regions. Calving regions are identified in green, the feeding regions in orange. The different shades of green and orange are used to simply differentiate the regions. Shortest paths are those that minimize travel time (colorbar: *days*); assuming a constant swimming speed of  $80 \text{ km day}^{-1}$
